# Supplementary material for: Association of Frailty Status and Dietary Patterns in a Nationally Representative Sample of United States Adults with Olfactory Dysfunction
Source: Nutrients. 2022 Mar 15;14(6):1238. doi: 10.3390/nu14061238 (PMC8954153; doi:10.3390/nu14061238)
Supplement: Supplementary file 1 [file nutrients-14-01238-s001.zip › nutrients-1602560-SI.pdf]

Supplementary Materials

# Association of Frailty Status and Dietary Patterns in a Nationally Representative Sample of United States Adults with Olfactory Dysfunction

Varun Vohra <sup>1</sup>, Evelyn M. Leland <sup>1</sup>, Rodney J. Schlosser <sup>2</sup>, Vidyulata Kamath <sup>3</sup> and Nicholas R. Rowan <sup>1,\*</sup>

Table S1. Frailty index variables.

| Variable                                         | Dataset                                                      | Code     |
|--------------------------------------------------|--------------------------------------------------------------|----------|
| Ever told you had a stroke                       | Medical Conditions                                           | MCQ160F  |
| Ever told you had thyroid problem                | Medical Conditions                                           | MCQ160M  |
| Ever told you had cancer or malignancy           | Medical Conditions                                           | MCQ220   |
| Ever told you had a heart attack                 | Medical Conditions                                           | MCQ160E  |
| Ever told you had coronary heart disease         | Medical Conditions                                           | MCQ160C  |
| Ever told you had angina/angina pectoris         | Medical Conditions                                           | MCQ160D  |
| Doctor ever said you had arthritis               | Medical Conditions                                           | MCQ160A  |
| Have serious difficulty seeing                   | Disability                                                   | DLQ020   |
| Have serious difficulty hearing                  | Disability                                                   | DLQ010   |
| Doctor said you have diabetes                    | Diabetes Questionnaire                                       | DIQ010   |
| Ever told you had weak/failing kidneys           | Kidney Conditions – Urology                                  | KIQ022   |
| Leak urine during physical activities            | Kidney Conditions – Urology                                  | KIQ042   |
| Urinated before reaching the toilet              | Kidney Conditions – Urology                                  | KIQ044   |
| Leak urine during nonphysical activities         | Kidney Conditions – Urology                                  | KIQ046   |
| Using fork, knife, drinking from cup             | Physical Functioning                                         | PFQ061K  |
| Dressing yourself with difficulty                | Physical Functioning                                         | PFQ061L  |
| Getting in and out of bed with difficulty        | Physical Functioning                                         | PFQ061J  |
| Standing up from armless chair with difficulty   | Physical Functioning                                         | PFQ061I  |
| Managing money with difficulty                   | Physical Functioning                                         | PFQ061A  |
| Preparing meals with difficulty                  | Physical Functioning                                         | PFQ061G  |
| Standing for long periods with difficulty        | Physical Functioning                                         | PFQ061M  |
| Stooping, crouching, kneeling with difficulty    | Physical Functioning                                         | PFQ061D  |
| Grasping/holding small objects with difficulty   | Physical Functioning                                         | PFQ061P  |
| Lifting or carrying with difficulty              | Physical Functioning                                         | PFQ061E  |
| Pushing or pulling large objects with difficulty | Physical Functioning                                         | PFQ061T  |
| Attending social events with difficulty          | Physical Functioning                                         | PFQ061R  |
| Experiencing confusion/memory problems           | Physical Functioning                                         | PFQ057   |
| 60 sec. pulse                                    | Blood Pressure                                               | BPXPPLS  |
| Systolic: Blood pres (1st rdg) mm Hg             | Blood Pressure                                               | BPXSY1   |
| Systolic: Blood pres (2nd rdg) mm Hg             | Blood Pressure                                               | BPXSY2   |
| Systolic: Blood pres (3rd rdg) mm Hg             | Blood Pressure                                               | BPXSY3   |
| Serum total folate (ng/mL)                       | Folate Forms – Total and Individual – Serum                  | LBDFOT   |
| Glycohemoglobin (%)                              | Glycohemoglobin                                              | LBXGH    |
| Red blood cell count (million cells/uL)          | Complete Blood Count with 5 parts Differential - Whole Blood | LBXRBCSI |
| Hemoglobin (g/dL)                                | Complete Blood Count with 5 parts Differential - Whole Blood | LBXHGB   |
| Red cell distribution width (%)                  | Complete Blood Count with 5 parts Differential – Whole Blood | LBXRDW   |
| Lymphocyte percent (%)                           | Complete Blood Count with 5 parts Differential – Whole Blood | LBXLYPCT |
| Segmented neutrophils percent (%)                | Complete Blood Count with 5 parts Differential – Whole Blood | LBXNEPCT |
| Number of prescription medications taken         | Prescription Medications                                     | RXDCOUNT |
| Taken prescription medicine, past month          | Prescription Medications                                     | RXDUSE   |
| Ever told have osteoporosis/brittle bones        | Osteoporosis                                                 | OSQ060   |
| General health condition                         | Hospital Utilization and Access to Care                      | HUQ010   |
| Health now compared to 1 year ago                | Hospital Utilization and Access to Care                      | HUQ020   |
| Overnight hospital patient in last year          | Hospital Utilization and Access to Care                      | HUQ071   |

**Table S2.** Factor loadings of dietary patterns characteristic of olfactory dysfunction<sup>a</sup>

| Dietary Components | Folate and Iron DP (12.2%) <sup>b</sup> | Calcium and Phosphorous DP (11.8%) | Magnesium and Fiber DP (11.7%) | Protein and Selenium DP (11.3%) | Carbs and Fat DP (8.5%) | β-Carotene and Vitamin-A DP (7.8%) |
|--------------------|-----------------------------------------|------------------------------------|--------------------------------|---------------------------------|-------------------------|------------------------------------|
| Protein            | —                                       | 0.28                               | 0.20                           | 0.89                            | —                       | —                                  |
| Carbs              | —                                       | —                                  | 0.17                           | —                               | -0.89                   | —                                  |
| Total sugar        | —                                       | —                                  | —                              | —                               | -0.66                   | —                                  |
| Fiber              | —                                       | —                                  | 0.75                           | —                               | —                       | 0.28                               |
| Sat. Fat           | —                                       | 0.26                               | -0.53                          | —                               | 0.31                    | —                                  |
| MUFA               | —                                       | —                                  | —                              | —                               | 0.67                    | —                                  |
| PUFA               | —                                       | —                                  | 0.19                           | —                               | 0.56                    | —                                  |
| Cholesterol        | —                                       | —                                  | -0.21                          | 0.53                            | —                       | —                                  |
| Vitamin A          | 0.3                                     | 0.41                               | 0.24                           | —                               | —                       | 0.69                               |
| β-Carotene         | —                                       | —                                  | 0.31                           | —                               | —                       | 0.94                               |
| Vitamin B1         | 0.67                                    | 0.29                               | 0.134                          | —                               | —                       | —                                  |
| Vitamin B2         | 0.45                                    | 0.68                               | —                              | —                               | —                       | —                                  |
| Niacin             | 0.61                                    | —                                  | —                              | 0.59                            | —                       | —                                  |
| Vitamin B6         | 0.56                                    | 0.31                               | 0.29                           | 0.33                            | —                       | —                                  |
| Folate             | 0.87                                    | —                                  | —                              | —                               | —                       | —                                  |
| Vitamin C          | —                                       | 0.21                               | 0.37                           | —                               | —                       | 0.25                               |
| Vitamin D          | —                                       | 0.67                               | —                              | —                               | —                       | —                                  |
| Vitamin K          | —                                       | —                                  | 0.38                           | 0.14                            | —                       | 0.59                               |
| Calcium            | —                                       | 0.81                               | —                              | —                               | —                       | —                                  |
| Phosphorous        | —                                       | 0.76                               | 0.36                           | 0.36                            | —                       | —                                  |
| Magnesium          | —                                       | 0.39                               | 0.79                           | —                               | 0.21                    | 0.23                               |
| Iron               | 0.83                                    | —                                  | —                              | —                               | —                       | —                                  |
| Zinc               | 0.56                                    | 0.35                               | —                              | 0.22                            | —                       | —                                  |
| Copper             | —                                       | —                                  | 0.68                           | —                               | 0.2                     | —                                  |
| Sodium             | —                                       | —                                  | —                              | 0.49                            | —                       | 0.24                               |
| Potassium          | —                                       | 0.49                               | 0.56                           | —                               | —                       | 0.32                               |
| Selenium           | —                                       | —                                  | —                              | 0.86                            | —                       | —                                  |
| Caffeine           | —                                       | —                                  | —                              | —                               | —                       | —                                  |

MUFA: monounsaturated fatty acid, PUFA: polyunsaturated fatty acid. <sup>a</sup> Factor loadings < |0.2| were omitted. <sup>b</sup> Variance accounted for by each dietary pattern.

**Table S3.** Multiple logistic regression analyses<sup>a</sup> examining the association between dietary patterns and frailty in older adults with olfactory dysfunction, adjusted for gustatory dysfunction<sup>b</sup>

|                                 | Frailty Index |              |         | Physical Frailty |              |         |
|---------------------------------|---------------|--------------|---------|------------------|--------------|---------|
|                                 | AOR           | 95% CI       | p-value | AOR              | 95% CI       | p-value |
| DP 1 (folate and iron)          | 0.93          | 0.84 to 1.03 | 0.12    | 1.007            | 0.71 to 1.42 | 0.95    |
| DP 2 (calcium and phosphorus)   | 0.89          | 0.77 to 1.02 | 0.071   | 0.9              | 0.72 to 1.14 | 0.25    |
| DP 3 (magnesium and fiber)      | 0.91          | 0.82 to 1.01 | 0.068   | 0.98             | 0.81 to 1.18 | 0.71    |
| DP 4 (protein and selenium)     | 0.83          | 0.69 to 0.98 | 0.039*  | 0.76             | 0.6 to 0.97  | 0.036*  |
| DP 5 (carbs and fat)            | 0.85          | 0.63 to 1.16 | 0.19    | 0.78             | 0.51 to 1.21 | 0.17    |
| DP 6 (β-carotene and vitamin A) | 0.75          | 0.59 to 0.97 | 0.036*  | 0.85             | 0.53 to 1.35 | 0.34    |

AOR: adjusted odds ratio, CI: confidence interval, DP: dietary pattern. <sup>a</sup> Models were adjusted for age, gender, race, BMI, income-to-poverty ratio, energy, smoking, and gustatory dysfunction (32 NaCl). <sup>b</sup> Methods for gustatory dysfunction classification listed in Bernstein et al. (2021) [2]. \* (p < 0.05).

**Table S4.** Multiple logistic regression analysis examining the association between dietary patterns and frailty in older normosmic adults.

|                                 | Frailty Index |              |         | Physical Frailty |              |         |
|---------------------------------|---------------|--------------|---------|------------------|--------------|---------|
|                                 | AOR           | 95% CI       | p-value | AOR              | 95% CI       | p-value |
| DP 1 (folate and iron)          | 1.01          | 0.97 to 1.04 | 0.73    | 1.0365           | 0.97 to 1.11 | 0.37    |
| DP 2 (calcium and phosphorus)   | 1.00          | 0.97 to 1.04 | 0.86    | 1.0356           | 0.96 to 1.12 | 0.44    |
| DP 3 (magnesium and fiber)      | 0.99          | 0.95 to 1.03 | 0.55    | 1.0072           | 0.94 to 1.08 | 0.85    |
| DP 4 (protein and selenium)     | 0.97          | 0.92 to 1.02 | 0.29    | 0.9766           | 0.88 to 1.09 | 0.67    |
| DP 5 (carbs and fat)            | 0.94          | 0.85 to 1.05 | 0.35    | 0.968            | 0.84 to 1.11 | 0.68    |
| DP 6 (β-carotene and vitamin A) | 0.99          | 0.94 to 1.04 | 0.70    | 0.98             | 0.93 to 1.04 | 0.52    |

AOR: adjusted odds ratio, CI: confidence interval, DP: dietary pattern. Models were adjusted for age, gender, race, BMI, income-to-poverty ratio, energy, and smoking.

**Table S5.** Subgroup classified as frail by FI and robust by FP—demographics and health metrics.

|                         |              |
|-------------------------|--------------|
| Age                     | 65.9±0.62    |
| Gender                  |              |
| Male                    | 67 (0.55)    |
| Female                  | 55 (0.45)    |
| BMI                     | 31.25±0.57   |
| Race                    |              |
| Non-Hispanic White      | 62 (0.51)    |
| Mexican American        | 13 (0.11)    |
| Other Hispanic          | 11 (0.09)    |
| Non-Hispanic Black      | 27 (0.22)    |
| Non-Hispanic Asian      | 7 (0.06)     |
| Other Race              | 2 (0.016)    |
| Income-to-poverty ratio | 2.35±0.36    |
| Current smoker          |              |
| No                      | 105 (0.86)   |
| Yes                     | 17 (0.14)    |
| Energy (kcal)           | 1862.83±28.4 |
| Frailty index score     | 0.29±0.004   |
